# Supplementary material for: Bacterial Lipid II Analogs: Novel In Vitro Substrates for Mammalian Oligosaccharyl Diphosphodolichol Diphosphatase (DLODP) Activities
Source: MDPI journal article supplement (doi:10.3390/molecules24112135), 2019-06-06
Supplement: s1 [file s1]

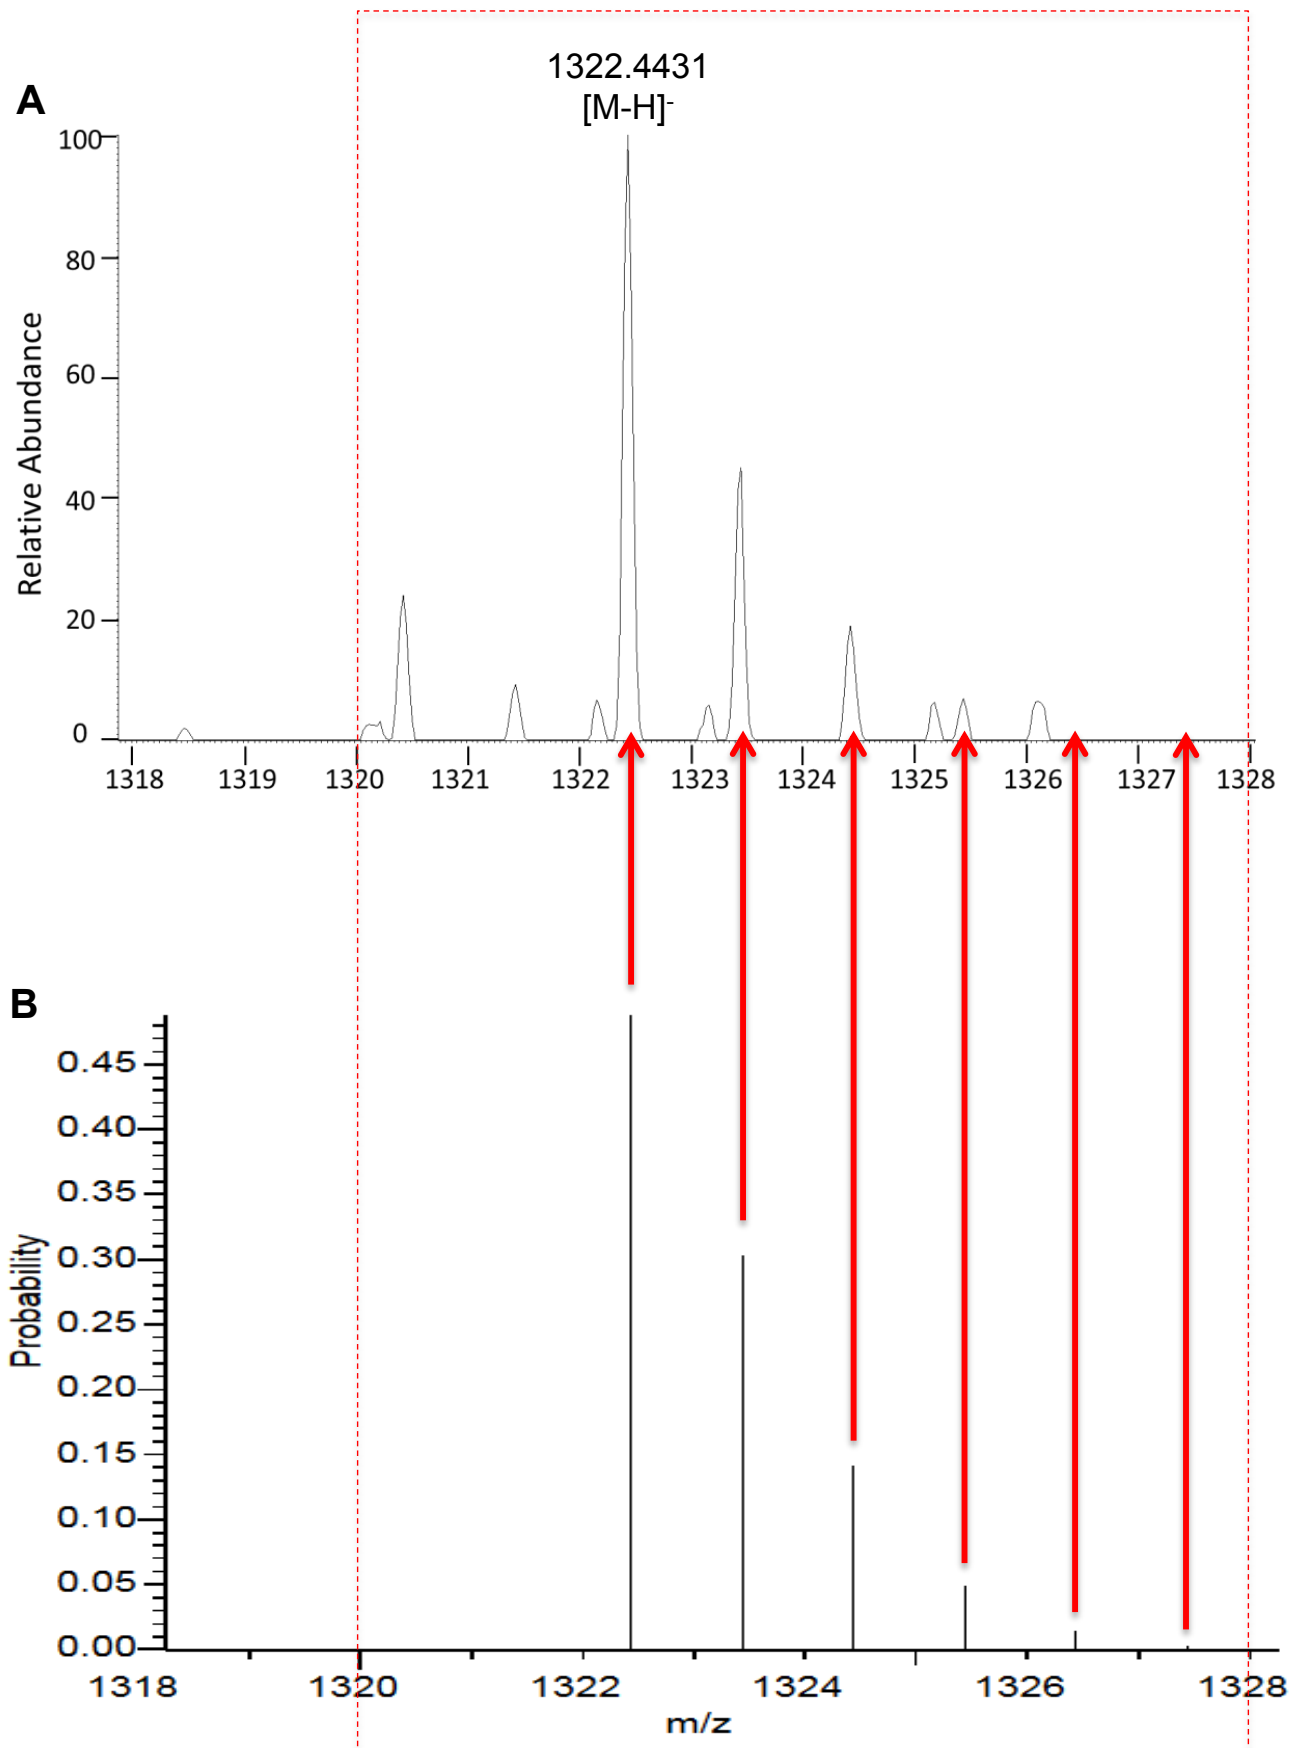

The observed isotopolog cluster centered around the 1322.4431 [M-H]<sup>-</sup> signal (A) is aligned with the theoretical cluster (B) computed for GM5P (22).
